# Supplementary material
Source: PubMed Central journal article supplement (PMC3383106)
Supplement: supp_91.7-suppl.S29_10.1177_0022034512450299_Appendix.pdf [file supp_91.7-suppl.S29_10.1177_0022034512450299_Appendix.pdf]

## ORIGINAL REPORT

# Dental Abnormalities in Schimke Immuno-osseous Dysplasia

M. Morimoto<sup>1,2</sup>, O. Kérourédan<sup>3</sup>, M. Gendronneau<sup>3</sup>, C. Shuen<sup>1,2</sup>, A. Baradaran-Heravi<sup>1,2</sup>, Y. Asakura<sup>4</sup>, M. Basiratnia<sup>5</sup>, R. Bogdanović<sup>6</sup>, D. Bonneau<sup>7</sup>, A. Buck<sup>8</sup>, J. Charrow<sup>9</sup>, P. Cochat<sup>10</sup>, K.A. DeHaai<sup>11</sup>, M.S. Fenkçi<sup>12</sup>, P. Frange<sup>13</sup>, S. Fründ<sup>14</sup>, H. Fryssira<sup>15</sup>, K. Keller<sup>16</sup>, S. Kirmani<sup>17</sup>, C. Kobelka<sup>18</sup>, K. Kohler<sup>19</sup>, D.B. Lewis<sup>20</sup>, L. Massella<sup>21</sup>, D.R. McLeod<sup>22</sup>, D.V. Milford<sup>23</sup>, F. Nobili<sup>24</sup>, A.H. Olney<sup>11</sup>, C.N. Semerci<sup>25</sup>, N. Stajčić<sup>6</sup>, A. Stein<sup>26</sup>, S. Taque<sup>27</sup>, J. Zonana<sup>16</sup>, T. Lücke<sup>28</sup>, G. Henderson<sup>2,29</sup>, M. Bonnaure-Mallet<sup>3</sup>, and C.F. Boerkoel<sup>1,2\*</sup>

## APPENDIX

### Cell Culture

Dermal fibroblasts from SIOD patients were isolated and cultured from skin biopsies of the forearm. The fibroblasts were grown in high glucose Dulbecco's Modified Eagles Medium (Invitrogen, Burlington, ON) supplemented with 10% fetal bovine serum (Invitrogen, Burlington, ON), and 1% antibiotic-antimycotic (Invitrogen, Burlington, ON).

### Immunofluorescence

$5 \times 10^5$  cells were grown overnight on a coverslip in a 6-well plate. Cells were fixed with 4% paraformaldehyde and

then permeabilized with 0.5% Triton X-100 for 15 minutes each at room temperature. Non-specific binding sites were blocked overnight with Blocker Casein in PBS (Pierce, Rockford, IL, USA) containing 10% normal horse serum at 4°C. The cells were then incubated with rabbit anti-SMARCAL1 serum (1:200) (Kilic *et al.*, 2005) and anti-prolyl 4-hydroxylase (1:50, 5B5, Abcam, Cambridge, MA, USA) diluted in blocking buffer overnight at 4°C. Alexa Fluor-conjugated secondary antibodies Alexa 488 and Alexa 555 (1:1000, Molecular Probes, Burlington, ON, Canada) were used to detect the primary antibodies. Cells were mounted in Vectashield

containing 4',6-diamidino-2-phenylindole (DAPI, Vector Laboratories, Burlington, ON, Canada). Images were acquired using a 100x/1.30 oil Plan-NEOFLUAR objective lens, a Zeiss Axiovert 200 inverted microscope, a Zeiss AxioCamMR camera, and the Zeiss Axiovision imaging system.

### Immunoblot

Cell lysates were fractionated by 12% sodium dodecyl sulfate polyacrylamide gel electrophoresis (SDS-PAGE) and transferred to a polyvinylidene fluoride membrane. The membrane was blocked in PBS containing 0.2% I-Block (Applied Biosystems, Foster City, CA, USA) and

DOI: 10.1177/0022034512450299. <sup>1</sup>Department of Medical Genetics, Child and Family Research Institute, University of British Columbia, Vancouver, BC, Canada; <sup>2</sup>Rare Disease Foundation, Vancouver, BC, Canada; <sup>3</sup>Université Européenne de Bretagne, Université de Rennes 1 and Centre Hospitalier Universitaire de Rennes, Rennes, France; <sup>4</sup>Department of Endocrinology and Metabolism, Kanagawa Children's Medical Center, Yokohama, Japan; <sup>5</sup>Department of Pediatric Nephrology, Nephro-Urology Research Center, Shiraz University of Medical Sciences, Shiraz, Iran; <sup>6</sup>Institute of Mother and Child Healthcare of Serbia, Belgrade, Serbia; <sup>7</sup>Département de Génétique, Centre Hospitalier Universitaire d'Angers, Angers, France; <sup>8</sup>Medizinische Hochschule Hannover, Kinderklinik, Hannover, Germany; <sup>9</sup>Children's Memorial Hospital, Chicago, IL, USA; <sup>10</sup>Service de Pédiatrie, Centre de Référence des Maladies Rénales Rares, Hospices Civils de Lyon and Université de Lyon, Lyon, France; <sup>11</sup>Department of Pediatrics, Munroe-Meyer Institute for Genetics & Rehabilitation, University of Nebraska Medical Center, Omaha, NE, USA; <sup>12</sup>Department of Internal Medicine, Division of Endocrinology and Metabolism, Cerrahi Hospital, Denizli, Turkey; <sup>13</sup>Pediatric Immunology & Hematology Unit, Necker Hospital, Paris, France; <sup>14</sup>Department of General Pediatrics, Pediatric Nephrology, University Children's Hospital, Münster, Germany; <sup>15</sup>Department of Medical Genetics, Aghia Sophia Children's Hospital, Athens University Medical School, Athens, Greece; <sup>16</sup>Oregon Institute on Disability & Development, Child Development and Rehabilitation Center, Oregon Health & Science University, Portland, OR, USA; <sup>17</sup>Department of Medical Genetics, Mayo Clinic, Rochester, MN, USA; <sup>18</sup>Genetics Department, Kaiser Permanente Medical Group, San Francisco, CA, USA; <sup>19</sup>Park Dental Ridges, Burnsville, MN, USA; <sup>20</sup>Department of Pediatrics, Immunology Program and Institute for Immunity, Transplantation, and Infection, Stanford University, Palo Alto, CA, USA; <sup>21</sup>Division of Nephrology, Bambino Gesù Children's Hospital and Research Institute, Rome, Italy; <sup>22</sup>Department of Medical Genetics, Alberta Children's Hospital, Calgary, Alberta, Canada; <sup>23</sup>Department of Nephrology, Birmingham Children's Hospital, Birmingham, UK; <sup>24</sup>Service de Néphrologie Pédiatrique, Centre Hospitalier Universitaire de Besançon, Besançon, France; <sup>25</sup>Department of Medical Genetics, Pamukkale University Hospital, Denizli, Turkey; <sup>26</sup>Department of Pediatrics, University Children's Hospital Essen, Essen, Germany; <sup>27</sup>Département de Pédiatrie, Centre Hospitalier Universitaire de Fontenay, Rennes, France; <sup>28</sup>Department of Neuropediatrics, Children's Hospital, Ruhr-University Bochum, Bochum, Germany; and <sup>29</sup>Department of Anatomic Pathology, University of British Columbia and Children's and Women's Health Centre of British Columbia, Vancouver, BC, Canada; \*corresponding author, boerkoel@interchange.ubc.ca

0.1% Tween 20 overnight at 4°C. Anti-SMARCAL1 (1:2000) (Kilic *et al.*, 2005) and anti-glyceraldehyde 3-phosphate dehydrogenase (GAPDH, 1:2000, 6C5, Advanced ImmunoChemical Inc., Long Beach, CA, USA) were used as primary antibodies. Alkaline phosphatase-conjugated secondary antibodies (1:10,000, Bio-rad Laboratories, Mississauga, ON, Canada) were used to detect the primary antibodies. The bound antibody was detected by chemiluminescence using CDP-Star (Applied Biosystems, Streetsville, ON,

Canada) according to the manufacturer's specifications.

#### MTT Assay

$3 \times 10^3$  cells were cultured in triplicate for each sample in a 96-well plate and cell viability and proliferation were assessed after 24 and 48 hours using the MTT assay (M5655, Sigma-Aldrich, Oakville, ON) as previously described (Mosmann, 1983). The relative viability and proliferation rates were calculated for the 24-hour interval, and each SIOD cell line was compared to control fibroblasts.

#### Polymerase Chain Reaction (PCR)

Following reverse transcription, 1.25  $\mu$ l of cDNA (equivalent to 50 ng RNA) served as template for each reaction and was amplified with the HotStarTaq Plus Master Mix Kit (Qiagen, Toronto, ON, Canada). The following conditions used for amplification: 1 cycle of 95°C for 5 minutes, followed by 30 cycles of 94°C for 30 seconds, 55°C for 30 seconds, 72°C for 1 minute, and a final extension at 72°C for 10 minutes. PCR was performed using the primers listed in Appendix Table 1.

#### Appendix Figure 1.

Additional dental radiographs showing the tooth pathology of patients with identified bi-allelic *SMARCAL1* mutations. (a) Bitewing radiograph of SD16 showing a mild dental phenotype with normal molar roots and crowns. The white arrow indicates a retained deciduous molar. (b-f) Lateral skull radiographs of SD33a, SD33b, SD50, SD78, and SD131 illustrating the distinctive bulbous crowns and thin molar roots. (g) Occlusion radiograph of SD120.

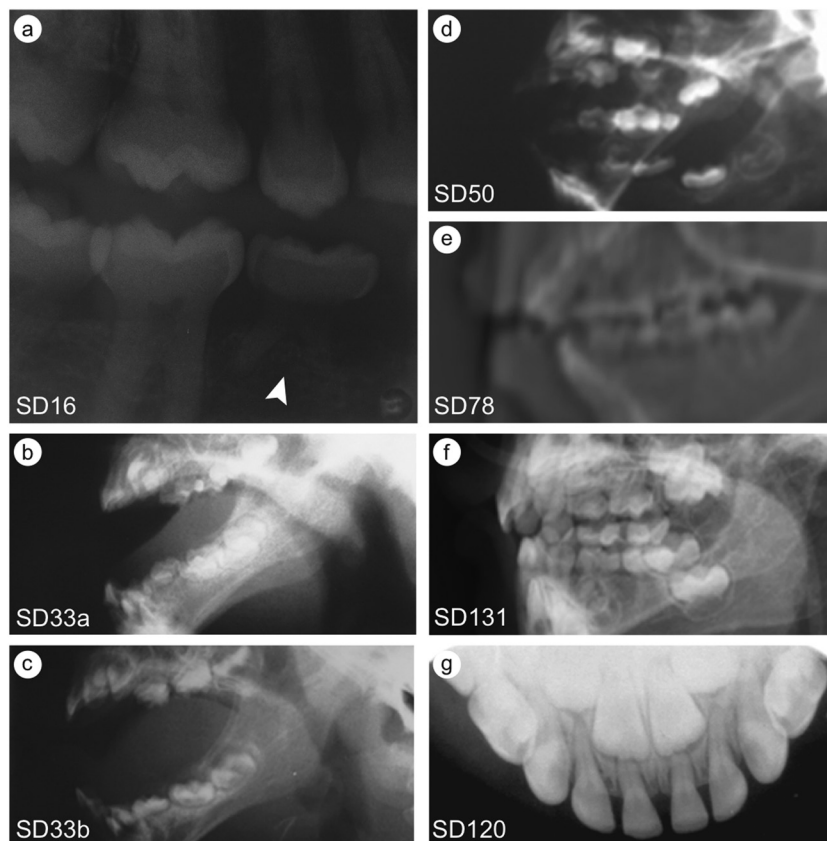

**Appendix Figure 2.**

Analysis of SMARCAL1 protein expression in the developing incisor, canine, and premolar. (a-c) Photomicrographs of SMARCAL1 immunohistochemical staining of the incisor, canine, and premolar. (a) Overview of the cross-section of the jawbone of a 98-day-gestation fetus. Twenty tooth buds give rise to the deciduous teeth, and each half jaw consists of 2 incisors, 1 canine, and 2 premolars at this stage of development. Four of the 5 tooth buds present in a developing half jaw can be observed in this section. (b) SMARCAL1 is expressed in the incisor and the canine. (c) SMARCAL1 is expressed in the premolar. Note that the bud of the permanent premolar also showed expression of SMARCAL1. (d-f) Photomicrographs of pre-immune staining of an adjacent section showed minimal non-specific staining. The boxed regions correspond to the higher-magnification images. Abbreviations: C, canine; I, incisor; P, permanent premolar; PM, premolar. Scale bars: 200  $\mu$ m.

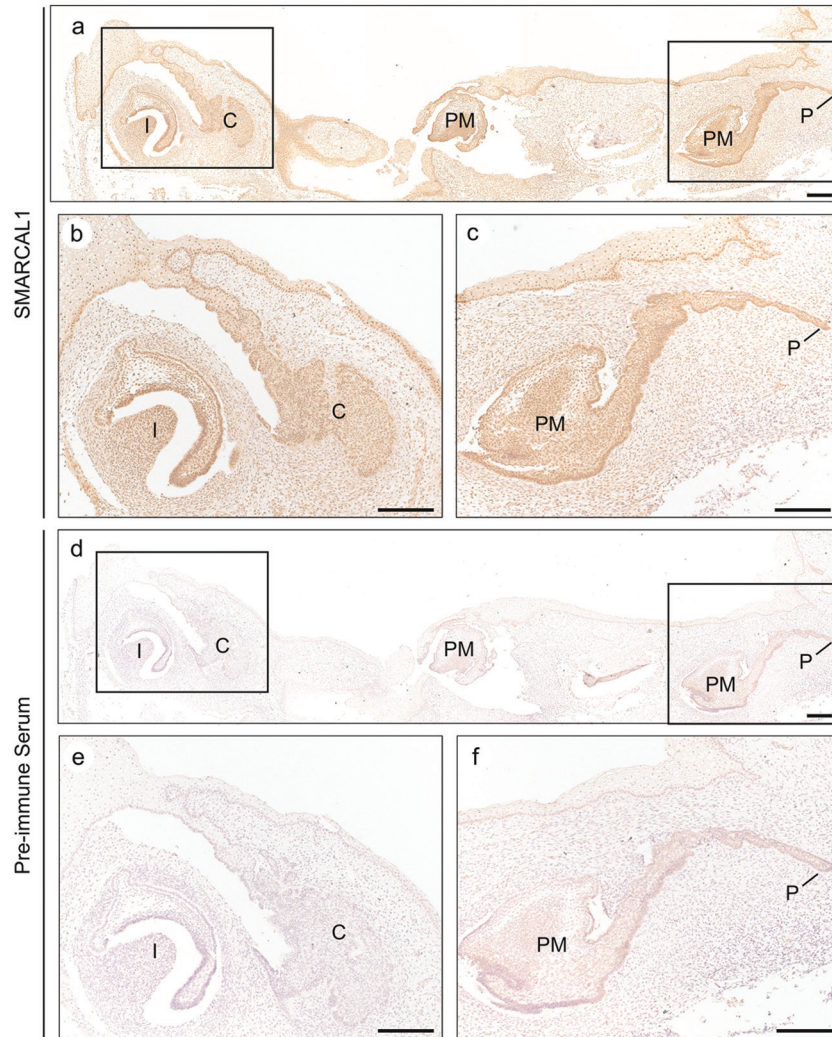

**Appendix Figure 3.**

Transcriptional responses of SIOD patient dermal fibroblasts stimulated with WNT3A, BMP4, or TGFβ1, comparing relative gene expression between time-points. The transcriptional responses of fibroblasts from an unaffected control (white bars) and patients SD120 (light grey bars) and SD123 (dark grey bars) were measured by qRT-PCR following induction with WNT3A, BMP4, or TGFβ1 for 0, 2, 4, 8, 12, 16, 20, or 24 hrs. Expression of housekeeping gene *GAPDH* was used as the internal control; expression of each gene was first normalized to *GAPDH* expression and then graphed relative to its expression in the relevant cell line at time = 0 hrs. Asterisks denote significant gene expression changes within a cell line between the time-point of interest and time = 0 hrs. \* = p < 0.05.

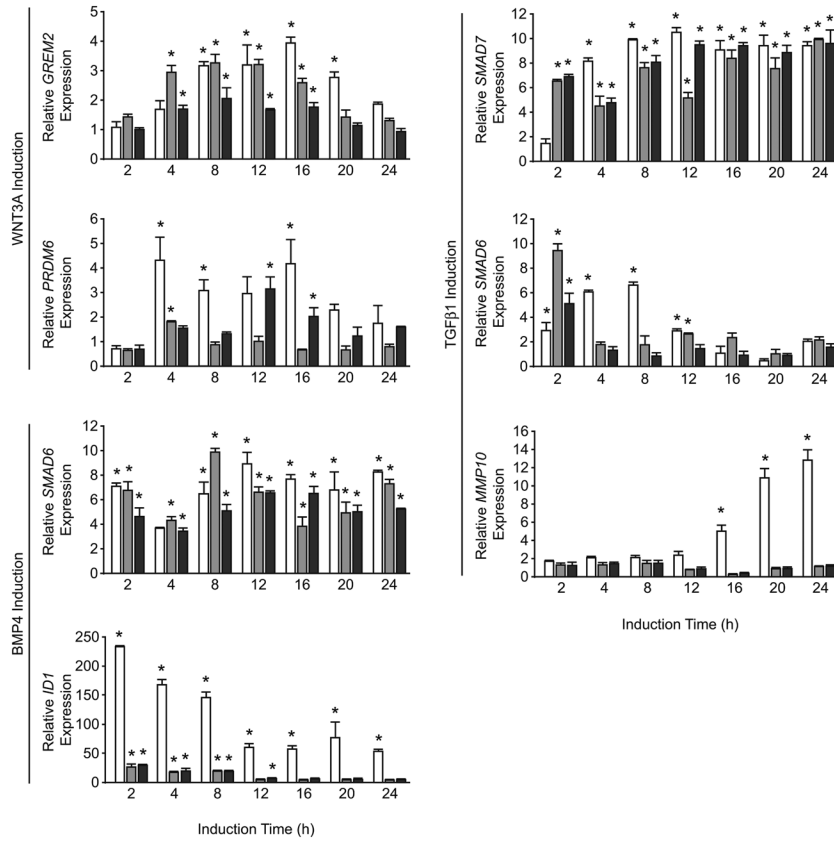

**Appendix Figure 4.**

Unaltered or minimally altered transcriptional responses of SIOD patient dermal fibroblasts stimulated with WNT3A, BMP4, or TGF $\beta$ 1, comparing relative gene expression between patient and unaffected control fibroblasts at each time-point. **(a)** The relative basal gene expression levels of fibroblasts from an unaffected control (white bars) and patients SD120 (light grey bars) and SD123 (dark grey bars) were measured by qRT-PCR. Expression of housekeeping gene *GAPDH* was used as the internal control; expression of each gene was first normalized to *GAPDH* expression and then graphed relative to the expression of the unaffected control. Error bars represent one standard deviation. \* =  $p < 0.05$ . **(b)** The transcriptional responses of fibroblasts from an unaffected control (white bars) and patients SD120 (light grey bars) and SD123 (dark grey bars) were measured by qRT-PCR following induction with WNT3A, BMP4, or TGF $\beta$ 1 for 0, 2, 4, 8, 12, 16, 20, or 24 hrs. Expression of housekeeping gene *GAPDH* was used as the internal control; expression of each gene was first normalized to *GAPDH* expression and then graphed relative to its expression in the relevant cell line at time = 0 hrs. \* =  $p < 0.05$ .

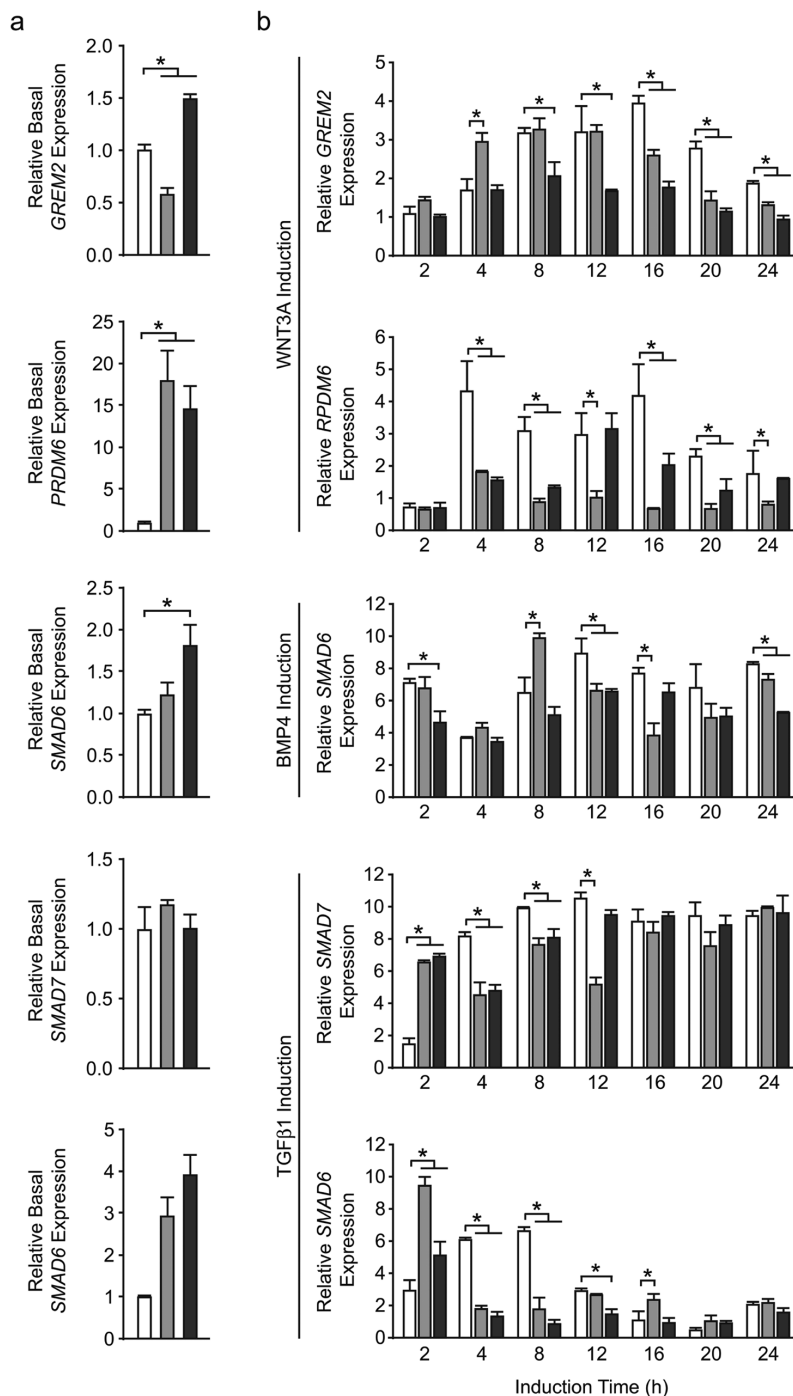

**Appendix Table 1.**

Primer Sequences Used in This Study

| Primer           | Sequence                  |
|------------------|---------------------------|
| GAPDH-cDNA-F     | CTTTTGCCTCGCCAGCCGAG      |
| GAPDH-cDNA-R     | GGTGACCAGGCGCCAATACG      |
| SMARCAL1-cDNA1-F | CCTCTACAAGGACCCAAAGCAGCAG |
| SMARCAL1-cDNA1-R | TCCAGGGTGTCTCCCATGTTCTGG  |
| GREM2-F          | GGCGGGGGAGACCAAACCTTA     |
| GREM2-R          | CTTCCAGAACATCCTGCAATGACGT |
| ID1-F            | GCTATGCGGGGTGCCTAAGG      |
| ID1-R            | GGAGGCCTTCAGCGACACAA      |
| MMP10-F          | TCGCCAGTTCGCCCTTTCG       |
| MMP10-R          | AGAGGCAGGGGAGGTCCGTA      |
| PRDM6-F          | AGGTTCCGGGCGGCACAATC      |
| PRDM6-R          | CGGCGCCTCGAACTGAAAAC      |
| SMAD6-F          | CCGGGTGAATTCTCAGACGCC     |
| SMAD6-R          | AGCCGATCTTGCTGCGCGTT      |
| SMAD7-F          | ACGCGGGAGGTGGATGGTGT      |
| SMAD7-R          | ACCCAGCCCTTCACAAAGCTG     |



**Appendix Table 2.**  
Dental Findings in SIOD Patients with Bi-allelic *SMARCAL1* Mutations

| Pedigree No. | <i>SMARCAL1</i> Mutations                                | Disease Severity Score <sup>a</sup> | Dental Findings |                                                            |                       |                                                            | Other |
|--------------|----------------------------------------------------------|-------------------------------------|-----------------|------------------------------------------------------------|-----------------------|------------------------------------------------------------|-------|
|              |                                                          |                                     | Microdontia     | Hypodontia                                                 | Molar Root Hypoplasia |                                                            |       |
| SD8          | c.[1190delT];[?]p                                        | 6                                   | +               | -                                                          | NR                    | -                                                          |       |
| SD16         | c.[1933C>T];[1643T>A]                                    | 3                                   | +               | +                                                          | +                     | Retained deciduous molar                                   |       |
| SD18a        | c.[1756C>T];[1756C>T]                                    | 3                                   | -               | +                                                          | NR                    | -                                                          |       |
| SD18c        | c.[1756C>T];[1756C>T]                                    | 2                                   | -               | +                                                          | -                     | Retained 75                                                |       |
|              |                                                          |                                     |                 | 15, 16, 18, 28, 35, 37, 38, 42, 47, 48                     |                       |                                                            |       |
| SD22         | c.[2459G>A];[2459G>A]                                    | 5                                   | -               | NR                                                         | NR                    | NR                                                         |       |
| SD23         | c.[2542G>T];[2542G>T]                                    | 4                                   | -               | -                                                          | NR                    | NR                                                         |       |
| SD27         | c.[1940A>C];[1940A>C]                                    | 3                                   | +               | +                                                          | +                     | Increased caries, retained 64, 75                          |       |
|              |                                                          |                                     |                 | 15, 17, 18, 24, 25, 27, 28, 34, 35, 37, 38, 44, 45, 47, 48 |                       |                                                            |       |
| SD28         | c.[1696A>T];1698G>C;1702delG];[1696A>T;1698G>C;1702delG] | 5                                   | -               | -                                                          | -                     | -                                                          |       |
| SD29         | c.[1934delG];[862+1G>T]                                  | 7                                   | -               | +                                                          | +                     | Abn superior incisors, delayed dentition                   |       |
| SD33a        | c.[1146_1147delAA;1147+1_2delGT];[1097-2A>G]             | 4                                   | -               | -                                                          | +                     | NR                                                         |       |
| SD33b        | c.[1146_1147delAA;1147+1_2delGT];[1097-2A>G]             | 6                                   | -               | -                                                          | +                     | NR                                                         |       |
| SD35         | c.[1736C>T];[2321C>A]                                    | 6                                   | -               | -                                                          | NR                    | NR                                                         |       |
| SD38         | c.[1096+1G>A];[1096+1G>A]                                | 6                                   | +               | +                                                          | +                     | Delayed dentition, retained 54, 55, 64, 65, 74, 75, 84, 85 |       |
|              |                                                          |                                     |                 | 14, 15, 18, 24, 25, 28, 35, 38, 45, 47, 48                 |                       |                                                            |       |
| SD44         | c.[2321C>A];[1191delG]                                   | 5                                   | -               | +                                                          | +                     | NR                                                         |       |
| SD47         | c.[2459G>A];[?]p                                         | 4                                   | +               | NR                                                         | NR                    | NR                                                         |       |
| SD48         | c.[1939A>C];[1939A>C]                                    | 6                                   | +               | +                                                          | NR                    | NR                                                         |       |

(continued)

**Appendix Table 2.** (Continued)

|        |                                                                 |   |    |  |  |    |                                                 |    |
|--------|-----------------------------------------------------------------|---|----|--|--|----|-------------------------------------------------|----|
| SD49   | c.[2321C>A];[1920_1921insG]                                     | 6 | +  |  |  | NR | NR                                              | NR |
| SD50   | c.[2542G>T];[2542G>T]                                           | 4 | +  |  |  | +  | Abn enamel                                      |    |
| SD51   | c.[2542G>T];[2459G>A]                                           | 4 | +  |  |  | NR | -                                               |    |
| SD57   | c.[955C>T];[955C>T]                                             | 5 | +  |  |  | +  | Retained 54, 55, 64, 65, 73, 74, 75, 83, 84, 85 |    |
| SD60   | c.[2542G>T];[2542G>T]                                           | 5 | +  |  |  | +  | -                                               |    |
| SD61   | c.[1146_1147delAA;1147+1_2delGT];[1146_1147delAA;1147+1_2delGT] | 5 | -  |  |  | -  | NR                                              |    |
| SD65a  | c.[2542G>T];[836T>C]                                            | 1 | -  |  |  | -  | -                                               |    |
| SD65b  | c.[2542G>T];[836T>C]                                            | 3 | -  |  |  | -  | -                                               |    |
| SD66   | c.[1933C>T];[1933C>T]                                           | 5 | +  |  |  | +  | Increased caries                                |    |
| SD70   | c.[340_341insAGTCCAC];[836T>C]                                  | 6 | +  |  |  | +  | Abn dentin                                      |    |
| SD74   | c.[1736C>T];[?] <sup>b</sup>                                    | 3 | +  |  |  | +  | NR                                              |    |
| SD78   | c.[2264T>G];[1439C>T]                                           | 4 | NR |  |  | NR | NR                                              |    |
| SD79   | c.[2459G>A];[?] <sup>b</sup>                                    | 4 | -  |  |  | +  | NR                                              |    |
| SD84   | c.[2104T>G];[1248_1249insC]                                     | 6 | +  |  |  | NR | NR                                              |    |
| SD96   | c.[1427G>A];[1427G>A]                                           | 4 | +  |  |  | NR | NR                                              |    |
| SD99   | c.[1402G>C];[1402G>C]                                           | 4 | +  |  |  | -  | NR                                              |    |
| SD106  | c.[1682G>A];[1682G>A]                                           | 4 | -  |  |  | -  | NR                                              |    |
| SD107  | c.[2542G>T];[2542G>T]                                           | 4 | -  |  |  | +  | Abn enamel                                      |    |
| SD108a | c.[1798C>T];[1798C>T]                                           | 3 | -  |  |  | -  | NR                                              |    |
| SD108b | c.[1798C>T];[1798C>T]                                           | 1 | -  |  |  | -  | NR                                              |    |
| SD111  | c.[11296>C];[1592T>C]                                           | 6 | +  |  |  | -  | Abn enamel                                      |    |

(continued)



Appendix Table 2. (Continued)

|        |                                      |   |    |   |   |    |                                                        |
|--------|--------------------------------------|---|----|---|---|----|--------------------------------------------------------|
| SD112a | c.[1934G>A];[2542G>T]                | 4 | -  | - | - | NR | NR                                                     |
| SD112b | c.[1934G>A];[2542G>T]                | 3 | -  | - | - | NR | NR                                                     |
| SD114  | c.[1898T>C];[1898T>C]                | 4 | +  | + | + | +  | Discoloration                                          |
| SD115  | c.[1437_1438insG];[1437_1438insG]    | 5 | NR | - | - | -  | NR                                                     |
| SD119  | c.[2449C>T];[2542G>T]                | 4 | -  | + | + | +  | -                                                      |
| SD120  | c.[2291G>A];[2542G>T]                | 5 | +  | + | + | +  | NR                                                     |
| SD121  | c.[1382G>A];[2542G>T]                | 4 | -  | - | - | NR | NR                                                     |
| SD123  | c.[49C>T];[49C>T]                    | 4 | +  | - | - | NR | NR                                                     |
| SD124  | c.[1920_1921insG];[1920_1921insG]    | 2 | -  | - | - | NR | NR                                                     |
| SD127  | c.[1736C>T];[1736C>T]                | 5 | +  | + | + | +  | Increased caries, abn enamel and dentin, discoloration |
| SD131  | c.[1026C>A];[2264T>G]                | 7 | NR | + | + | +  | NR                                                     |
| SD133a | c.[1097-2A>G]; [2343_2347del(GCTGT)] | 4 | -  | - | - | NR | -                                                      |
| SD138  | c.[2542G>T];[2542G>T]                | 3 | -  | - | - | -  | -                                                      |

Abbreviations: +, feature present; -, feature not present; abn, abnormal; NR, not reported.

<sup>a</sup>To group patients according to disease severity, each patient's signs and symptoms were scored as previously described (Clewning *et al.*, 2007).

<sup>b</sup>[?] represents alleles with non-coding *SMARCAL1* mutations as previously described (Clewning *et al.*, 2007).

**Appendix Table 3.**

Summary of Immunohistochemical Analysis of SMARCAL1 Expression in the Developing Human Tooth

| Developmental Stage and Cell Type | Expression Level*      |                        |                         |
|-----------------------------------|------------------------|------------------------|-------------------------|
|                                   | 59-day-gestation Fetus | 98-day-gestation Fetus | 105-day-gestation Fetus |
| <b>Bud Stage</b>                  |                        |                        |                         |
| Oral epithelium                   | +++                    | NA                     | NA                      |
| Dental lamina                     | ++                     | NA                     | NA                      |
| Mesenchymal cell                  | +                      | NA                     | NA                      |
| <b>Cap Stage</b>                  |                        |                        |                         |
| Oral epithelium                   | NA                     | +++                    | NA                      |
| Dental lamina                     | NA                     | ++                     | NA                      |
| Outer dental epithelium           | NA                     | +++                    | NA                      |
| Stellate reticulum                | NA                     | ++                     | NA                      |
| Inner dental epithelium           | NA                     | +++                    | NA                      |
| Primary enamel knot               | NA                     | +++                    | NA                      |
| Dental papilla                    | NA                     | ++                     | NA                      |
| <b>Bell Stage</b>                 |                        |                        |                         |
| Oral epithelium                   | NA                     | NA                     | +++                     |
| Dental lamina                     | NA                     | NA                     | -                       |
| Outer dental epithelium           | NA                     | NA                     | ++                      |
| Stellate reticulum                | NA                     | NA                     | ++                      |
| Stratum intermedium               | NA                     | NA                     | +/-                     |
| Inner dental epithelium           | NA                     | NA                     | +++                     |
| Dental papilla                    | NA                     | NA                     | +/-                     |

\*Expression levels were all judged relative to the oral epithelium, which was scored as + + +. Abbreviations: -, no detectable expression; + - + + +, level of detectable expression; NA, not available.

**Appendix Table 4.**

Summary of Tooth Anomalies Associated with Disorders of DNA Repair or Genomic Instability

| Disorder                   | Gene(s)                                                                                                                                                                                                                                       | Dental Phenotype                                                                                                | Reference                                                                           |
|----------------------------|-----------------------------------------------------------------------------------------------------------------------------------------------------------------------------------------------------------------------------------------------|-----------------------------------------------------------------------------------------------------------------|-------------------------------------------------------------------------------------|
| <b>DNA Repair</b>          |                                                                                                                                                                                                                                               |                                                                                                                 |                                                                                     |
| Xeroderma pigmentosum      | <i>XPA</i><br><i>ERCC3</i><br><i>ERCC2</i><br><i>DDB2</i><br><i>ERCC4</i><br><i>ERCC5</i><br><i>ERCC1</i><br><i>POLH</i>                                                                                                                      | None reported                                                                                                   |                                                                                     |
| Cockayne syndrome          | <i>ERCC6</i><br><i>ERCC8</i>                                                                                                                                                                                                                  | Increased dental caries                                                                                         | Tan <i>et al.</i> , 2005                                                            |
| Trichothiodystrophy        | <i>ERCC2</i><br><i>ERCC3</i><br><i>GTF2H5</i>                                                                                                                                                                                                 | None reported                                                                                                   |                                                                                     |
| Lynch syndrome             | <i>MSH2</i>                                                                                                                                                                                                                                   | None reported                                                                                                   |                                                                                     |
| <b>Genomic instability</b> |                                                                                                                                                                                                                                               |                                                                                                                 |                                                                                     |
| Bloom syndrome             | <i>RECQL3</i>                                                                                                                                                                                                                                 | None reported                                                                                                   |                                                                                     |
| Werner syndrome            | <i>RECQL2</i>                                                                                                                                                                                                                                 | None reported                                                                                                   |                                                                                     |
| Rothmund-Thomson syndrome  | <i>RECQL4</i>                                                                                                                                                                                                                                 | Hypodontia, short roots, sensitive gingiva                                                                      | Haytac <i>et al.</i> , 2002; Roinioti and Stefanopoulos, 2007                       |
| Fanconi anemia             | <i>FANCA</i><br><i>FANCB</i><br><i>FANCC</i><br><i>BRCA2</i><br><i>FANCD2</i><br><i>FANCE</i><br><i>FANCF</i><br><i>FANCG</i><br><i>FANCI</i><br><i>BRIP1</i><br><i>FANCL</i><br><i>FANCM</i><br><i>PALB2</i><br><i>RAD51C</i><br><i>SLX4</i> | Microdontia, hypodontia, increased dental caries, gingivitis, periodontitis, transposition, supernumerary teeth | Acikgoz <i>et al.</i> , 2005; Tekcicek <i>et al.</i> , 2007                         |
| Ataxia telangiectasia      | <i>ATM</i>                                                                                                                                                                                                                                    | None reported                                                                                                   |                                                                                     |
| Nijmegen breakage syndrome | <i>NBS1</i>                                                                                                                                                                                                                                   | None reported                                                                                                   |                                                                                     |
| Seckel syndrome            | <i>ATR</i>                                                                                                                                                                                                                                    | Microdontia, hypodontia, short roots, malocclusion, taurodontism, dentinal dysplasia, enamel hypoplasia         | Kjaer <i>et al.</i> , 2001; Seymen <i>et al.</i> , 2002; Regen <i>et al.</i> , 2010 |
| Dyskeratosis congenita     | <i>DKC1</i><br><i>TERC</i><br><i>TERT</i><br><i>TINF2</i><br><i>NHP2</i><br><i>NOP10</i>                                                                                                                                                      | Short roots, mild taurodontism                                                                                  | Atkinson <i>et al.</i> , 2008; Abdel-Karim <i>et al.</i> , 2009                     |

**Appendix Table 5.**

The Target Genes of Morphogens for Which Transcriptional Responses Have Been Defined in Dermal Fibroblasts, Which Were Investigated in This Study

| Morphogen | Target Gene  | Reference                           |
|-----------|--------------|-------------------------------------|
| WNT3A     | <i>GREM2</i> | Klapholz-Brown <i>et al.</i> , 2007 |
| WNT3A     | <i>PRDM6</i> | Klapholz-Brown <i>et al.</i> , 2007 |
| BMP4      | <i>ID1</i>   | Fessing <i>et al.</i> , 2010        |
| BMP4      | <i>SMAD6</i> | Fessing <i>et al.</i> , 2010        |
| TGFβ1     | <i>SMAD6</i> | Afrakhte <i>et al.</i> , 1998       |
| TGFβ1     | <i>SMAD7</i> | Afrakhte <i>et al.</i> , 1998       |
| TGFβ1     | <i>MMP10</i> | Ishikawa <i>et al.</i> , 2010       |

**Appendix Table 6.**

Relative Basal Gene Expression Levels of the SIOD Patient Dermal Fibroblasts (SD120 and SD123) Used in This Study

| Morphogen and Target Gene | Sample | Relative Basal Gene Expression <sup>a</sup> | P-value <sup>b</sup>   |
|---------------------------|--------|---------------------------------------------|------------------------|
| <b>WNT3A</b>              |        |                                             |                        |
| <i>GREM2</i>              | SD120  | 0.6                                         | 2.5 x 10 <sup>-3</sup> |
| <i>GREM2</i>              | SD123  | 1.5                                         | 1.9 x 10 <sup>-3</sup> |
| <b>WNT3A</b>              |        |                                             |                        |
| <i>PRDM6</i>              | SD120  | 18.0                                        | 2.0 x 10 <sup>-3</sup> |
| <i>PRDM6</i>              | SD123  | 14.6                                        | 2.0 x 10 <sup>-3</sup> |
| <b>BMP4</b>               |        |                                             |                        |
| <i>ID1</i>                | SD120  | 15.5                                        | 6.4 x 10 <sup>-3</sup> |
| <i>ID1</i>                | SD123  | 9.7                                         | 3.8 x 10 <sup>-2</sup> |
| <b>BMP4</b>               |        |                                             |                        |
| <i>SMAD6</i>              | SD120  | 1.2                                         | NS                     |
| <i>SMAD6</i>              | SD123  | 1.8                                         | 2.7 x 10 <sup>-3</sup> |
| <b>TGFβ1</b>              |        |                                             |                        |
| <i>SMAD6</i>              | SD120  | 3.0                                         | NS                     |
| <i>SMAD6</i>              | SD123  | 3.9                                         | NS                     |
| <b>TGFβ1</b>              |        |                                             |                        |
| <i>SMAD7</i>              | SD120  | 1.2                                         | NS                     |
| <i>SMAD7</i>              | SD123  | 1.0                                         | NS                     |
| <b>TGFβ1</b>              |        |                                             |                        |
| <i>MMP10</i>              | SD120  | 1.8                                         | NS                     |
| <i>MMP10</i>              | SD123  | 1.4                                         | NS                     |

<sup>a</sup>Expression of each gene was first normalized to *GAPDH* expression and then graphed relative to the expression level of the unaffected control dermal fibroblast cell line.

<sup>b</sup>p values were calculated by the Tukey *post hoc* test following one-way ANOVA analysis and represent the statistical significance between the relative gene expression of the patient cell line of interest and the unaffected control cell line.

Abbreviation: NS, not significant.

**Appendix Table 7.**

Relative Gene Expression Changes in SIOD Patient Dermal Fibroblasts in Response to the Morphogens WNT3A, BMP4, or TGFβ1 over 24 hrs

| Morphogen and Target Gene | Sample  | Time-point (hrs after induction) | Relative Gene Expression <sup>a</sup> | P-value <sup>b</sup> |
|---------------------------|---------|----------------------------------|---------------------------------------|----------------------|
| <b>WNT3A</b>              |         |                                  |                                       |                      |
| <i>GREM2</i>              | Control | 2                                | 1.10                                  |                      |
| <i>GREM2</i>              | SD120   | 2                                | 1.45                                  | NS                   |
| <i>GREM2</i>              | SD123   | 2                                | 1.02                                  | NS                   |
| <i>GREM2</i>              | Control | 4                                | 1.71                                  |                      |
| <i>GREM2</i>              | SD120   | 4                                | 2.97                                  | $7.8 \times 10^{-3}$ |
| <i>GREM2</i>              | SD123   | 4                                | 1.72                                  | NS                   |
| <i>GREM2</i>              | Control | 8                                | 3.20                                  |                      |
| <i>GREM2</i>              | SD120   | 8                                | 3.29                                  | NS                   |
| <i>GREM2</i>              | SD123   | 8                                | 2.08                                  | $4.5 \times 10^{-2}$ |
| <i>GREM2</i>              | Control | 12                               | 3.22                                  |                      |
| <i>GREM2</i>              | SD120   | 12                               | 3.23                                  | NS                   |
| <i>GREM2</i>              | SD123   | 12                               | 1.69                                  | $4.8 \times 10^{-2}$ |
| <i>GREM2</i>              | Control | 16                               | 3.97                                  |                      |
| <i>GREM2</i>              | SD120   | 16                               | 2.62                                  | $1.1 \times 10^{-3}$ |
| <i>GREM2</i>              | SD123   | 16                               | 1.79                                  | $2.4 \times 10^{-4}$ |
| <i>GREM2</i>              | Control | 20                               | 2.80                                  |                      |
| <i>GREM2</i>              | SD120   | 20                               | 1.45                                  | $1.6 \times 10^{-3}$ |
| <i>GREM2</i>              | SD123   | 20                               | 1.16                                  | $5.2 \times 10^{-4}$ |
| <i>GREM2</i>              | Control | 24                               | 1.89                                  |                      |
| <i>GREM2</i>              | SD120   | 24                               | 1.33                                  | $5.5 \times 10^{-3}$ |
| <i>GREM2</i>              | SD123   | 24                               | 0.95                                  | $1.2 \times 10^{-3}$ |
| <b>WNT3A</b>              |         |                                  |                                       |                      |
| <i>PRDM6</i>              | Control | 2                                | 0.74                                  |                      |
| <i>PRDM6</i>              | SD120   | 2                                | 0.68                                  | NS                   |
| <i>PRDM6</i>              | SD123   | 2                                | 0.72                                  | NS                   |
| <i>PRDM6</i>              | Control | 4                                | 4.32                                  |                      |
| <i>PRDM6</i>              | SD120   | 4                                | 1.84                                  | $1.3 \times 10^{-2}$ |
| <i>PRDM6</i>              | SD123   | 4                                | 1.59                                  | $5.4 \times 10^{-3}$ |
| <i>PRDM6</i>              | Control | 8                                | 3.11                                  |                      |
| <i>PRDM6</i>              | SD120   | 8                                | 0.90                                  | $3.7 \times 10^{-4}$ |
| <i>PRDM6</i>              | SD123   | 8                                | 1.36                                  | $1.8 \times 10^{-3}$ |
| <i>PRDM6</i>              | Control | 12                               | 2.99                                  |                      |
| <i>PRDM6</i>              | SD120   | 12                               | 1.05                                  | $1.5 \times 10^{-2}$ |

(continued)

Appendix Table 7. (Continued)

|              |         |    |        |                      |
|--------------|---------|----|--------|----------------------|
| <i>PRDM6</i> | SD123   | 12 | 3.18   | NS                   |
| <i>PRDM6</i> | Control | 16 | 4.93   |                      |
| <i>PRDM6</i> | SD120   | 16 | 0.67   | $2.5 \times 10^{-3}$ |
| <i>PRDM6</i> | SD123   | 16 | 2.06   | $1.5 \times 10^{-2}$ |
| <i>PRDM6</i> | Control | 20 | 2.32   |                      |
| <i>PRDM6</i> | SD120   | 20 | 0.70   | $6.6 \times 10^{-4}$ |
| <i>PRDM6</i> | SD123   | 20 | 1.26   | $8.8 \times 10^{-3}$ |
| <i>PRDM6</i> | Control | 24 | 1.78   |                      |
| <i>PRDM6</i> | SD120   | 24 | 0.83   | $3.9 \times 10^{-2}$ |
| <i>PRDM6</i> | SD123   | 24 | 1.63   | NS                   |
| <b>BMP4</b>  |         |    |        |                      |
| <i>ID1</i>   | Control | 2  | 233.98 |                      |
| <i>ID1</i>   | SD120   | 2  | 27.17  | $1.5 \times 10^{-5}$ |
| <i>ID1</i>   | SD123   | 2  | 30.06  | $1.5 \times 10^{-5}$ |
| <i>ID1</i>   | Control | 4  | 168.62 |                      |
| <i>ID1</i>   | SD120   | 4  | 17.89  | $1.7 \times 10^{-5}$ |
| <i>ID1</i>   | SD123   | 4  | 20.37  | $1.3 \times 10^{-5}$ |
| <i>ID1</i>   | Control | 8  | 146.54 |                      |
| <i>ID1</i>   | SD120   | 8  | 20.06  | $1.6 \times 10^{-5}$ |
| <i>ID1</i>   | SD123   | 8  | 19.59  | $2.3 \times 10^{-5}$ |
| <i>ID1</i>   | Control | 12 | 60.99  |                      |
| <i>ID1</i>   | SD120   | 12 | 5.41   | $3.1 \times 10^{-6}$ |
| <i>ID1</i>   | SD123   | 12 | 7.34   | $3.8 \times 10^{-6}$ |
| <i>ID1</i>   | Control | 16 | 58.07  |                      |
| <i>ID1</i>   | SD120   | 16 | 4.73   | $1.7 \times 10^{-5}$ |
| <i>ID1</i>   | SD123   | 16 | 6.84   | $1.3 \times 10^{-5}$ |
| <i>ID1</i>   | Control | 20 | 77.8   |                      |
| <i>ID1</i>   | SD120   | 20 | 5.25   | $7.9 \times 10^{-4}$ |
| <i>ID1</i>   | SD123   | 20 | 5.86   | $8.9 \times 10^{-4}$ |
| <i>ID1</i>   | Control | 24 | 54.24  |                      |
| <i>ID1</i>   | SD120   | 24 | 4.87   | $3.5 \times 10^{-5}$ |
| <i>ID1</i>   | SD123   | 24 | 5.43   | $3.7 \times 10^{-5}$ |
| <b>BMP4</b>  |         |    |        |                      |
| <i>SMAD6</i> | Control | 2  | 7.13   |                      |
| <i>SMAD6</i> | SD120   | 2  | 6.80   | NS                   |
| <i>SMAD6</i> | SD123   | 2  | 4.67   | $4.6 \times 10^{-2}$ |
| <i>SMAD6</i> | Control | 4  | 3.71   |                      |

(continued)

Appendix Table 7. (Continued)

|                               |         |    |      |                      |
|-------------------------------|---------|----|------|----------------------|
| <i>SMAD6</i>                  | SD120   | 4  | 4.35 | NS                   |
| <i>SMAD6</i>                  | SD123   | 4  | 3.47 | NS                   |
| <i>SMAD6</i>                  | Control | 8  | 6.51 |                      |
| <i>SMAD6</i>                  | SD120   | 8  | 9.91 | $1.5 \times 10^{-2}$ |
| <i>SMAD6</i>                  | SD123   | 8  | 5.14 | NS                   |
| <i>SMAD6</i>                  | Control | 12 | 8.96 |                      |
| <i>SMAD6</i>                  | SD120   | 12 | 6.65 | $1.5 \times 10^{-2}$ |
| <i>SMAD6</i>                  | SD123   | 12 | 6.60 | $2.2 \times 10^{-2}$ |
| <i>SMAD6</i>                  | Control | 16 | 7.71 |                      |
| <i>SMAD6</i>                  | SD120   | 16 | 3.87 | $1.3 \times 10^{-2}$ |
| <i>SMAD6</i>                  | SD123   | 16 | 6.54 | NS                   |
| <i>SMAD6</i>                  | Control | 20 | 6.83 |                      |
| <i>SMAD6</i>                  | SD120   | 20 | 4.97 | NS                   |
| <i>SMAD6</i>                  | SD123   | 20 | 5.05 | NS                   |
| <i>SMAD6</i>                  | Control | 24 | 8.29 |                      |
| <i>SMAD6</i>                  | SD120   | 24 | 7.34 | $2.9 \times 10^{-2}$ |
| <i>SMAD6</i>                  | SD123   | 24 | 5.27 | $1.0 \times 10^{-3}$ |
| <b>TGF<math>\beta</math>1</b> |         |    |      |                      |
| <i>SMAD6</i>                  | Control | 2  | 2.96 |                      |
| <i>SMAD6</i>                  | SD120   | 2  | 9.49 | $6.6 \times 10^{-4}$ |
| <i>SMAD6</i>                  | SD123   | 2  | 5.16 | $4.7 \times 10^{-2}$ |
| <i>SMAD6</i>                  | Control | 4  | 6.12 |                      |
| <i>SMAD6</i>                  | SD120   | 4  | 1.83 | $3.9 \times 10^{-4}$ |
| <i>SMAD6</i>                  | SD123   | 4  | 1.36 | $3.2 \times 10^{-4}$ |
| <i>SMAD6</i>                  | Control | 8  | 6.67 |                      |
| <i>SMAD6</i>                  | SD120   | 8  | 1.81 | $1.6 \times 10^{-4}$ |
| <i>SMAD6</i>                  | SD123   | 8  | 0.90 | $7.1 \times 10^{-5}$ |
| <i>SMAD6</i>                  | Control | 12 | 2.94 |                      |
| <i>SMAD6</i>                  | SD120   | 12 | 2.69 | NS                   |
| <i>SMAD6</i>                  | SD123   | 12 | 1.49 | $2.1 \times 10^{-3}$ |
| <i>SMAD6</i>                  | Control | 16 | 1.12 |                      |
| <i>SMAD6</i>                  | SD120   | 16 | 2.39 | $4.6 \times 10^{-2}$ |
| <i>SMAD6</i>                  | SD123   | 16 | 0.96 | NS                   |
| <i>SMAD6</i>                  | Control | 20 | 0.51 |                      |
| <i>SMAD6</i>                  | SD120   | 20 | 1.07 | NS                   |
| <i>SMAD6</i>                  | SD123   | 20 | 0.94 | NS                   |
| <i>SMAD6</i>                  | Control | 24 | 2.10 |                      |

(continued)



Appendix Table 7. (Continued)

|              |         |    |       |                        |
|--------------|---------|----|-------|------------------------|
| <i>SMAD6</i> | SD120   | 24 | 2.20  | NS                     |
| <i>SMAD6</i> | SD123   | 24 | 1.62  | NS                     |
| <b>TGFβ1</b> |         |    |       |                        |
| <i>SMAD7</i> | Control | 2  | 1.52  |                        |
| <i>SMAD7</i> | SD120   | 2  | 6.58  | 1.3 x 10 <sup>-5</sup> |
| <i>SMAD7</i> | SD123   | 2  | 6.95  | 1.4 x 10 <sup>-5</sup> |
| <i>SMAD7</i> | Control | 4  | 8.19  |                        |
| <i>SMAD7</i> | SD120   | 4  | 4.55  | 2.7 x 10 <sup>-3</sup> |
| <i>SMAD7</i> | SD123   | 4  | 4.83  | 1.4 x 10 <sup>-3</sup> |
| <i>SMAD7</i> | Control | 8  | 9.92  |                        |
| <i>SMAD7</i> | SD120   | 8  | 7.67  | 1.4 x 10 <sup>-2</sup> |
| <i>SMAD7</i> | SD123   | 8  | 8.11  | 2.5 x 10 <sup>-2</sup> |
| <i>SMAD7</i> | Control | 12 | 10.54 |                        |
| <i>SMAD7</i> | SD120   | 12 | 5.20  | 1.1 x 10 <sup>-3</sup> |
| <i>SMAD7</i> | SD123   | 12 | 9.53  | NS                     |
| <i>SMAD7</i> | Control | 16 | 9.11  |                        |
| <i>SMAD7</i> | SD120   | 16 | 8.42  | NS                     |
| <i>SMAD7</i> | SD123   | 16 | 9.45  | NS                     |
| <i>SMAD7</i> | Control | 20 | 9.47  |                        |
| <i>SMAD7</i> | SD120   | 20 | 7.60  | NS                     |
| <i>SMAD7</i> | SD123   | 20 | 8.90  | NS                     |
| <i>SMAD7</i> | Control | 24 | 9.47  |                        |
| <i>SMAD7</i> | SD120   | 24 | 9.95  | NS                     |
| <i>SMAD7</i> | SD123   | 24 | 9.64  | NS                     |
| <b>TGFβ1</b> |         |    |       |                        |
| <i>MMP10</i> | Control | 2  | 1.75  |                        |
| <i>MMP10</i> | SD120   | 2  | 1.34  | NS                     |
| <i>MMP10</i> | SD123   | 2  | 1.29  | NS                     |
| <i>MMP10</i> | Control | 4  | 2.14  |                        |
| <i>MMP10</i> | SD120   | 4  | 1.36  | 1.8 x 10 <sup>-2</sup> |
| <i>MMP10</i> | SD123   | 4  | 1.49  | 4.2 x 10 <sup>-2</sup> |
| <i>MMP10</i> | Control | 8  | 2.17  |                        |
| <i>MMP10</i> | SD120   | 8  | 1.52  | 4.1 x 10 <sup>-2</sup> |
| <i>MMP10</i> | SD123   | 8  | 1.54  | 4.6 x 10 <sup>-2</sup> |
| <i>MMP10</i> | Control | 12 | 2.42  |                        |
| <i>MMP10</i> | SD120   | 12 | 0.83  | 1.8 x 10 <sup>-3</sup> |
| <i>MMP10</i> | SD123   | 12 | 0.92  | 1.4 x 10 <sup>-3</sup> |

(continued)

**Appendix Table 7.** (Continued)

|              |         |    |       |                        |
|--------------|---------|----|-------|------------------------|
| <b>MMP10</b> | Control | 16 | 5.05  |                        |
| <b>MMP10</b> | SD120   | 16 | 0.80  | 5.6 x 10 <sup>-4</sup> |
| <b>MMP10</b> | SD123   | 16 | 0.87  | 4.2 x 10 <sup>-4</sup> |
| <b>MMP10</b> | Control | 20 | 10.91 |                        |
| <b>MMP10</b> | SD120   | 20 | 0.93  | 1.0 x 10 <sup>-4</sup> |
| <b>MMP10</b> | SD123   | 20 | 0.95  | 7.2 x 10 <sup>-5</sup> |
| <b>MMP10</b> | Control | 24 | 12.86 |                        |
| <b>MMP10</b> | SD120   | 24 | 1.17  | 5.7 x 10 <sup>-5</sup> |
| <b>MMP10</b> | SD123   | 24 | 1.21  | 4.0 x 10 <sup>-5</sup> |

<sup>a</sup>Expression of each gene was first normalized to *GAPDH* expression and then graphed relative to its expression in the relevant cell line at time = 0 hrs.

<sup>b</sup>P-values were calculated by the Tukey *post hoc* test following one-way ANOVA analysis and represent the statistical significance between the relative gene expression of the patient cell line of interest and the unaffected control cell line at each time-point.

Abbreviation: NS, not significant.

## Appendix References

- Abdel-Karim A, Frezzini C, Viggor S, Davidson LE, Thornhill MH, Yeoman CM (2009). Dyskeratosis congenita: a case report. *Oral Surg Oral Med Oral Pathol Oral Radiol Endod* 108:e20-e24.
- Acikgoz A, Ozden FO, Fisgin T, Acikgoz G, Duru F, Yarali N, *et al.* (2005). Oral and dental findings in Fanconi's anemia. *Pediatr Hematol Oncol* 22:531-539.
- Afrakhte M, Moren A, Jossan S, Itoh S, Sampath K, Westermarck B, *et al.* (1998). Induction of inhibitory Smad6 and Smad7 mRNA by TGF-beta family members. *Biochem Biophys Res Commun* 249:505-511.
- Atkinson JC, Harvey KE, Domingo DL, Trujillo MI, Guadagnini JP, Gollins S, *et al.* (2008). Oral and dental phenotype of dyskeratosis congenita. *Oral Dis* 14:419-427.
- Clewling JM, Fryssira H, Goodman D, Smithson F, Sloan EA, Lou S, *et al.* (2007). Schimke immunosseous dysplasia: suggestions of genetic diversity. *Hum Mutat* 28:273-283.
- Fessing MY, Atoyan R, Shander B, Mardaryev AN, Botchkarev VV, Poterlowicz K, *et al.* (2010). BMP signaling induces cell-type-specific changes in gene expression programs of human keratinocytes and fibroblasts. *J Invest Dermatol* 130:398-404.
- Haytac MC, Oztunc H, Mete UO, Kaya M (2002). Rothmund-Thomson syndrome: a case report. *Oral Surg Oral Med Oral Pathol Oral Radiol Endod* 94:479-484.
- Ishikawa F, Miyoshi H, Nose K, Shibamura M (2010). Transcriptional induction of MMP-10 by TGF-beta, mediated by activation of MEF2A and downregulation of class IIa HDACs. *Oncogene* 29:909-919.
- Kilic SS, Donmez O, Sloan EA, Elizondo LI, Huang C, Andre JL, *et al.* (2005). Association of migraine-like headaches with Schimke immuno-osseous dysplasia. *Am J Med Genet A* 135:206-210.
- Kjaer I, Hansen N, Beckett KB, Birkebaek N, Balslev T (2001). Craniofacial morphology, dentition, and skeletal maturity in four siblings with Seckel syndrome. *Cleft Palate Craniofac J* 38:645-651.
- Klapholz-Brown Z, Walmsley GG, Nusse YM, Nusse R, Brown PO (2007). Transcriptional program induced by Wnt protein in human fibroblasts suggests mechanisms for cell cooperativity in defining tissue microenvironments. *PLoS One* 2:e945.
- Mosmann T (1983). Rapid colorimetric assay for cellular growth and survival: application to proliferation and cytotoxicity assays. *J Immunol Methods* 65:55-63.
- Regen A, Nelson LP, Woo SB (2010). Dental manifestations associated with Seckel syndrome type II: a case report. *Pediatr Dent* 32:445-450.
- Roinioti TD, Stefanopoulos PK (2007). Short root anomaly associated with Rothmund-Thomson syndrome. *Oral Surg Oral Med Oral Pathol Oral Radiol Endod* 103:e19-e22.
- Seymen F, Tuna B, Kayserili H (2002). Seckel syndrome: report of a case. *J Clin Pediatr Dent* 26:305-309.
- Tan WH, Baris H, Robson CD, Kimonis VE (2005). Cockayne syndrome: the developing phenotype. *Am J Med Genet A* 135:214-216.
- Tekcicek M, Tavil B, Cakar A, Pinar A, Unal S, Gumruk F (2007). Oral and dental findings in children with Fanconi anemia. *Pediatr Dent* 29:248-252.
